# Supplementary material for: Changes in red blood cell parameters during incremental exercise in highly trained athletes of different sport specializations
Source: PeerJ. 2024 Mar 27;12:e17040. doi: 10.7717/peerj.17040 (PMC10981411; doi:10.7717/peerj.17040)
Supplement: Supplemental Information 1 [file peerj-12-17040-s001.xlsx]

## Sheet: Arkusz1
Sport	Age	Training history	Height	Weight	BMI	SMM	Total Bone Mass	Total Fat Mass	Total Lean Mass	Total TissueFat %	CK	LA0	LA1	LA2	LA3	LA4	LAmax	LAR5	LAR10	LAR15	LAR20	LAR30	VO2max	RBC0	RBC1	RBC2	RBC3	RBC4	RBCmax	RBCR5	RBCR10	RBCR15	RBCR20	RBCR30	Ht0	Ht1	Ht2	Ht3	Ht4	Htmax	HtR5	HtR10	HtR15	HtR20	HtR30	Hb0	Hb1	Hb2	Hb3
FU	24	11	178.5	72.7	22.8	33.2406	3.518	9.888	59.82	14.2	344	0.79	0.81	1.14	2.29	5.22	8.42	7.59	5.52	4.46	2.99	2.04	56.8088	4.56	4.66	4.65	4.67	4.78	4.75	4.62	4.51	4.33	4.28	4.31	0.393	0.404	0.405	0.41	0.415	0.419	0.403	0.393	0.377	0.376	0.375	8.32	8.63	8.63	8.63
FU	30	16	178.6	72.3	22.7	32.0787	3.415	11.251	57.986	16.2	63	0.93	1.97	2.51	5.24	8.71	12.01	10.98	9.21	7.23	5.82	3.56	55.325	5.03	5.4	5.44	5.56	5.57	5.58	5.36	5.38	5.25	5.18	5.02	0.422	0.451	0.453	0.463	0.467	0.467	0.454	0.449	0.438	0.432	0.42	8.88	9.5	9.69	9.81
FU	30	9	186	94.8	27.4	41.0984	4.119	16.616	74.704	18.2	254	1.33	1.78	2.16	5.27	7.61	11.49	9.52	8.27	6.3	5.01	3.64	54.6414	4.59	4.67	4.75	4.73	4.8	4.95	4.72	4.69	4.54	4.41	4.35	0.402	0.409	0.416	0.417	0.425	0.439	0.415	0.413	0.401	0.392	0.383	8.45	8.61	8.76	8.63
FU	26	9	176.5	76	24.4	33.1192	3.071	14.584	58.771	19.9	292	0.98	1.93	2.62	4.12	7.46	15.13	14.58	12.68	10.15	8.97	5.59	61.3158	4.91	5.1	4.97	5.17	5.24	5.38	5.08	5.07	4.93	5.02	4.87	0.4	0.413	0.406	0.419	0.427	0.443	0.418	0.42	0.402	0.41	0.394	8.76	9.07	9	9.25
FU	27	12	187	77.6	22.2	32.9953	3.676	13.837	60.357	18.6	169	1.06	1.24	1.64	2.8	5.62	10.44	9.89	8.64	7.12	5.33	3.74	57.3454	4.94	5.17	5.16	5.14	5.04	5.47	5.14	5.06	4.94	4.79	4.77	0.415	0.433	0.434	0.43	0.425	0.463	0.434	0.425	0.414	0.405	0.401	9.19	9.63	9.69	9.75
FU	30	17	169	72	25.2	31.1872	3.303	10.371	59.023	14.9	185	1.12	1.43	2.34	4.39	8.43	13.15	12.74	11.23	9.67	8.11	6.16	58.6111	4.37	4.55	4.56	4.6	4.7	4.86	4.59	4.53	4.35	4.37	4.21	0.369	0.387	0.384	0.387	0.398	0.413	0.387	0.383	0.367	0.37	0.356	7.89	8.26	8.32	8.38
FU	21	6	188.7	80.4	22.6	36.8318	3.728	9.979	67.269	12.9	361	0.95	0.99	1.31	2.1	4.56	6.92	5.87	5.03	3.69	2.92	2.05	53.3582	4.61	4.64	4.71	4.76	4.78	4.81	4.63	4.58	4.43	4.47	4.24	0.4	0.402	0.404	0.411	0.412	0.419	0.402	0.396	0.385	0.389	0.365	8.76	8.82	8.88	8.94
FU	20	7	178.4	78.2	24.6	34.6043	3.573	12.184	63.187	16.2	278	0.87	0.98	1.29	2.08	4.17	9.42	8.01	7.52	6.12	5.35	4.26	57.5448	4.93	4.95	4.99	5.16	5.24	5.3	5.2	4.89	4.8	4.63	4.71	0.398	0.396	0.403	0.418	0.421	0.428	0.417	0.397	0.389	0.374	0.382	8.63	8.76	8.82	9.13
FU	21	12	183.1	65.9	19.7	28.7964	3.008	10.572	52.93	16.6	444	0.89	1.53	2.31	4.08	7.12	10.09	9.98	9.07	7.26	5.76	4.06	56.4492	4.65	4.73	4.72	4.75	4.79	4.94	4.74	4.71	4.58	4.43	4.39	0.396	0.399	0.406	0.408	0.41	0.421	0.409	0.402	0.393	0.379	0.376	8.57	8.76	8.76	8.82
FU	32	16	179.8	86.8	26.8	36.3169	3.283	18.26	65.774	21.7	201	0.79	1.42	2.07	3.21	4.18	8.8	7.35	5.92	4.58	3.93	2.83	56.7972	4.82	4.97	4.99	5.01	5.1	5.17	4.96	4.83	4.86	4.62	4.59	0.403	0.415	0.419	0.419	0.432	0.435	0.417	0.405	0.406	0.388	0.385	9	9.25	9.19	9.31
FU	27	7	189.1	77.3	21.6	34.8473	3.633	10.672	63.467	14.4	237	0.78	1.43	1.78	3.9	6.39	13.21	12.75	11.32	10.48	8.52	6.23	58.8616	4.51	4.71	4.7	4.71	4.74	4.88	4.66	4.47	4.43	4.37	4.22	0.384	0.398	0.402	0.398	0.406	0.419	0.4	0.384	0.377	0.374	0.36	8.51	9	9	8.88
FU	19	5	191	99	27.1	43.714	4.31	18.615	76.485	19.6	291	0.84	1.65	2.7	4.75	5.57	6.53	5.66	4.49	3.12	2.49	1.6	52.2222	4.99	5.34	5.35	5.49	5.5	5.55	5.37	5.27	5.11	5.08	5	0.404	0.431	0.433	0.441	0.445	0.449	0.429	0.422	0.409	0.409	0.403	8.82	9.44	9.44	9.69
FU	27	8	179.2	82.2	25.6	37.1548	3.853	10.952	68.22	13.8	456	0.92	1.36	2.3	2.96	6.38	11.17	9.36	7.6	5.61	4.49	3.17	63.6253	5.24	5.32	5.55	5.44	5.58	5.63	5.26	5.22	5.11	4.98	5.17	0.423	0.425	0.444	0.437	0.443	0.452	0.423	0.415	0.41	0.397	0.409	9.07	9.25	9.56	9.56
RO	22	7	176.7	75.4	24.1	33.4896	2.903	10.998	62.042	15.1	442	0.78	0.66	0.74	0.9	1.78	9.06	7.83	6.72	5.62	4.36	3.12	70.8223	5.08	5.24	5.17	5.31	5.24	5.42	5.23	5.17	5.09	5.09	4.87	0.43	0.443	0.439	0.45	0.439	0.462	0.442	0.438	0.433	0.429	0.409	8.88	9	9.07	9.25
RO	21	8	176	61.5	19.9	27.5432	2.604	8.465	51.036	14.2	495	0.92	0.69	0.93	1.51	2.24	9.65	8.25	6.76	5.21	4.23	3.02	62.7642	4.92	4.77	4.96	5.05	5.2	5.34	5.23	5.04	5.04	4.86	4.79	0.446	0.431	0.45	0.452	0.471	0.483	0.47	0.453	0.453	0.435	0.432	9.19	8.88	9.13	9.38
RO	19	6	183.8	74.3	22	34.2344	3.264	9.295	62.117	13	242	0.67	0.6	0.64	0.85	1.85	8.46	7.02	5.28	3.84	3.13	1.84	68.5061	4.59	4.72	4.73	4.75	4.83	4.92	4.94	4.83	4.78	4.79	4.62	0.41	0.42	0.421	0.425	0.434	0.441	0.443	0.432	0.432	0.427	0.414	8.57	8.82	8.82	8.82
RO	19	9	190.6	74.7	20.6	33.7564	3.515	9.437	62.186	13.2	231	0.86	0.77	0.93	1.16	2.15	11.27	10.31	8.09	6.94	5.55	3.98	67.336	4.19	4.39	4.61	4.64	4.59	4.84	4.61	4.54	4.35	4.34	4.13	0.382	0.396	0.417	0.419	0.415	0.44	0.418	0.408	0.395	0.395	0.373	7.39	7.89	8.14	8.2
RO	32	11	181.5	80.4	24.4	34.1326	3.581	13.772	63.762	17.8	133	0.81	0.82	0.92	1.12	1.65	8.61	8.68	7.47	6.19	5.05	3.62	75.3731	5	5.14	5.11	5.12	5.17	5.25	5.04	5.04	4.96	4.88	4.61	0.446	0.457	0.45	0.453	0.461	0.468	0.45	0.452	0.442	0.43	0.41	8.38	8.69	8.63	8.69
RO	29	11	185.5	74.7	21.7	32.8366	3.081	9.469	62.806	13.1	358	0.91	0.82	0.94	1.18	1.93	8.68	8.63	7.07	5.86	4.79	3.3	67.0683	4.85	4.76	5.08	5	5.05	5.26	5.1	4.96	4.94	4.99	4.78	0.424	0.417	0.443	0.435	0.443	0.463	0.449	0.439	0.431	0.433	0.418	8.63	8.51	9	9
RO	20	6	174.2	68	22.4	31.1355	2.745	10.362	55.512	15.7	84.1	1.52	0.89	1.91	3.18	4.38	8.11	6.35	4.42	3.57	2.77	1.61	68.2353	5.29	5.26	5.39	5.35	5.45	5.64	5.46	5.38	5.27	5.32	5.28	0.435	0.429	0.44	0.436	0.443	0.462	0.445	0.439	0.43	0.431	0.43	9.25	9.31	9.38	9.56
RO	21	11	184.5	79.7	23.4	36.3222	3.76	10.323	66.452	13.4	124	1.01	0.95	1.19	1.57	2.76	9.18	7.05	6.31	4.72	3.85	2.31	71.5182	5.34	5.49	5.62	5.55	5.69	5.77	5.79	5.69	5.6	5.47	5.22	0.455	0.463	0.474	0.473	0.487	0.494	0.497	0.488	0.472	0.47	0.441	9.07	9.44	9.69	9.56
RO	25	11	188.8	81.6	22.9	37.5428	3.531	9.831	68.317	12.6	163	0.72	0.77	0.95	1.12	1.67	9.25	7.98	5.96	4.86	3.51	2.66	64.0931	4.42	4.56	4.63	4.59	4.63	4.71	4.61	4.49	4.46	4.34	4.21	0.41	0.428	0.43	0.43	0.431	0.442	0.432	0.42	0.419	0.408	0.394	8.45	8.69	8.82	8.82
RO	24	11	175.4	70.2	22.8	30.2755	2.93	11.242	56.424	16.6	195	1.26	1.62	1.84	2.34	3.64	13.42	12.25	10.4	8.84	7.85	6.03	74.359	4.3	4.3	4.58	4.68	4.62	4.86	4.62	4.55	4.43	4.34	4.31	0.381	0.38	0.408	0.417	0.412	0.438	0.416	0.406	0.396	0.387	0.384	8.26	8.14	8.63	8.69
RO	20	8	177.6	70.7	22.4	30.908	3.016	8.078	60.294	11.8	179	1.29	1.36	1.38	1.82	3.15	15.38	12.26	10.69	9.02	8.69	7.32	76.8034	5.16	5.24	5.12	5.17	5.25	5.15	5.22	5.12	5.02	5.06	4.94	0.417	0.426	0.416	0.422	0.432	0.426	0.428	0.419	0.41	0.413	0.402	8.76	9.07	8.82	8.88
RO	23	10	179.4	58.6	18.2	26.7981	2.643	6.64	49.893	11.7	62.4	1.56	1.29	1.32	1.63	2.71	13.14	11.99	10.78	9.18	8	6.05	69.4539	4.26	4.25	4.35	4.32	4.47	4.51	4.4	4.29	4.18	4.09	4.04	0.376	0.381	0.386	0.383	0.397	0.408	0.391	0.381	0.371	0.363	0.356	8.01	8.07	8.14	8.14
RO	25	12	186.7	79.9	22.9	36.2637	3.793	12.634	64.032	16.5	209	0.78	0.71	0.91	0.95	1.39	9.93	9.28	7.62	6.03	5.22	3.77	70.5882	4.72	4.575	4.43	4.53	4.81	4.94	4.93	4.76	4.67	4.59	4.47	0.43	0.417	0.404	0.413	0.44	0.451	0.452	0.435	0.424	0.421	0.406	8.45	8.23	8.01	8.2
RO	18	6	187.5	72.7	20.7	33.6718	3.182	9.499	60.54	13.6	207	0.6	0.69	1.09	1.78	4.13	10.53	9.07	7.31	6.48	4.01	3.28	65.8872	4.54	4.81	5	5.11	5.14	5.21	4.92	4.94	4.77	4.7	4.59	0.377	0.4	0.417	0.427	0.429	0.437	0.414	0.411	0.397	0.395	0.383	7.82	8.32	8.51	8.63
LS	26	10	182.4	78.6	23.6	38.7229	3.435	7.783	68.345	10.2	476	0.69	1.6	2.57	4.61	7.07	9.54	8.69	7.04	5.33	4.35	3.08	52.9262	4.3	4.69	4.58	4.45	4.55	4.65	4.51	4.52	4.39	4.33	4.24	0.376	0.412	0.401	0.389	0.3985	0.408	0.397	0.401	0.385	0.378	0.371	8.26	8.82	8.82	8.57
LS	27	11	188	92.5	26.2	46.5372	4.283	6.862	82.408	7.7	376	0.93	1.79	2.35	3.96	8.83	10.48	7.71	4.96	3.81	2.53	1.55	49.8378	4.92	4.78	4.9	5.02	5.08	4.97	4.89	4.95	4.81	4.74	4.64	0.438	0.423	0.431	0.445	0.452	0.445	0.433	0.436	0.424	0.417	0.407	8.94	9	9.07	9.31
LS	23	12	187.1	89.2	25.5	44.6521	4.11	7.767	78.364	9	313	1.01	2.41	3.25	5.32	7.87	10.42	8.55	6.63	5.41	4.33	2.5	57.1749	4.99	5.22	5.1	5.06	5.11	5.17	4.98	4.94	4.98	4.83	4.84	0.43	0.451	0.44	0.437	0.442	0.447	0.429	0.427	0.428	0.419	0.418	9.19	9.44	9.38	9.38
LS	22	7	184.5	82.4	24.2	39.3216	3.828	11.268	68.107	14.2	226	0.84	1.78	2.41	4.04	7.04	9.02	7.41	7.02	5.21	3.11	2.01	49.7573	5.09	5.25	5.23	5.25	5.43	5.32	5.18	5.19	5.15	4.96	4.98	0.415625	0.439	0.434	0.443	0.452	0.446	0.433	0.435	0.429	0.414	0.418	8.9025	9.25	9.25	9.375
LS	21	6	196.6	91	23.5	49.9941	4.167	8.497	79.68	9.6	171	0.83	1.74	2.53	4.01	7.01	9.47	10.11	7.95	6.05	4.28	3.2	53.1868	4.8	4.95	4.99	5.01	5.14	4.98	4.82	4.92	4.69	4.73	4.68	0.431	0.442	0.447	0.448	0.459	0.446	0.43	0.441	0.419	0.423	0.421	9.19	9.31	9.56	9.63
LS	22	7	189	87.1	24.3	44.9742	4.187	8.994	75.871	10.6	321	1.01	1.21	1.64	2.63	6.72	9.81	8.83	7.12	6.02	5.38	4.21	51.0907	5	5.28	5.31	5.32	5.32	5.49	5.2	5.2	4.9	4.95	4.77	0.414	0.434	0.442	0.441	0.445	0.454	0.431	0.433	0.405	0.409	0.397	9.07	9.69	9.63	9.75
LS	27	10	183	79.3	23.7	38.0791	3.341	9.015	68.14	11.7	443	0.93	1.82	2.79	4.81	7.14	9.46	7.87	6.1	4.35	3.31	2.16	52.8373	4.57	4.58	4.64	4.72	4.76	4.81	4.62	4.53	4.42	4.4	4.28	0.395	0.394	0.404	0.41	0.413	0.416	0.399	0.393	0.38	0.381	0.373	8.57	8.57	8.69	8.88
LS	29	12	179.2	73.6	22.9	35.1203	3.269	8.516	62.407	12	701	1.42	1.56	1.88	3.04	5	6.97	5.23	4.06	3.11	2.37	1.61	52.038	4.74	4.77	4.8	5.01	5.1	5.18	4.81	4.81	4.74	4.62	4.52	0.404	0.4095	0.415	0.432	0.4395	0.447	0.411	0.416	0.404	0.395	0.386	8.69	8.755	8.82	9.19
LS	30	14	187.7	85	24.1	41.1888	3.761	10.202	72.744	12.3	123	0.61	2.17	3.81	5.17	10.29	11.22	12.05	10.78	9.63	7.69	5.01	48.7059	5	5	5.12	5.08	5.14	5.18	5.03	4.97	4.99	4.82	4.76	0.43	0.432	0.439	0.438	0.442	0.453	0.434	0.433	0.432	0.415	0.41	8.94	9.13	9.25	9.19
LS	24	11	188	77.8	22	36.817	3.422	7.595	67.464	10.1	244	0.98	1.28	1.65	2.78	8.09	12.02	11.13	9.72	7.34	5.87	3.92	62.4679	5.21	5.22	5.15	5.33	5.43	5.27	5.3	5.21	5.14	5.06	5.05	0.428	0.43	0.426	0.437	0.447	0.434	0.441	0.43	0.425	0.414	0.416	9.19	9.19	9.13	9.38
LS	22	8	182.6	79.7	23.9	40.0798	3.472	7.22	69.753	9.4	436	0.97	2.52	3.85	7.23	9.11	10.99	10.12	7.72	4.99	3.45	2.08	51.4429	4.94	4.99	5.12	5.14	5.2	5.28	5.13	5.08	4.93	4.72	4.74	0.425	0.426	0.444	0.439	0.448	0.457	0.443	0.435	0.42	0.405	0.404	9.19	9.38	9.5	9.5
LS	21	8	179.7	76.4	23.7	36.118	3.115	9.338	64.901	12.6	461	0.87	1.16	1.67	2.69	4.92	10.23	9.24	8.38	7.02	5.56	3.86	59.1623	4.23	4.25	4.41	4.27	4.47	4.58	4.41	4.38	4.32	4.19	4.16	0.398	0.397	0.412	0.397	0.418	0.427	0.413	0.411	0.401	0.389	0.387	8.38	8.32	8.76	8.38
[truncated: 61 more columns]
